# Supplementary material for: Toward food-grade production of the Bacteroides helcogenes protein-glutamine glutaminase with an optimized Bacillus subtilis strain
Source: Research Square preprint supplement (doi:10.21203/rs.3.rs-6894745/v1), 2025-07-09
Supplement: Supplementary file 1 [file b24f2b736ce81f70f09407d3.docx]

*Supplemental material*

**Toward food-grade production of the *Bacteroides helcogenes*
protein-glutamine glutaminase with an optimized *Bacillus subtilis* strain**

Jana Senger, Mario Keutgen, Nicole Roth, Ines Seitl, Lutz Fischer*

University of Hohenheim, Institute of Food Science and Biotechnology,

Department of Biotechnology and Enzyme Science, Garbenstr. 25, 70599 Stuttgart, Germany

*Corresponding author

E-mail address: lutz.fischer@uni-hohenheim.de

Tel.: +49 711 459 22311

**Supplemental Table 1: Plasmids used in this study.**

| **Plasmid** | **Description** |
| --- | --- |
| pLF_PaprE_ PhoD_pro-PGB | Plasmid with PGB expression cassette (=pA-PGB) with expression controlled by PaprE and pro-PGB gene (EMBL-EMI: ADV44662.1) fused to the PhoD signal peptide. |
| pJOE8999 | CRISPR/Cas9 plasmid for *B. subtilis* (Altenbuchner 2016) |
| pJOE8999_sgSigF | CRISPR/Cas9 plasmid with integrated sgRNA for *sigF* |
| pJOE8999_sgSigF_pA-PGB | CRISPR/Cas9 plasmid with integrated sgRNA for *sigF* and PGB expression cassette |
| pJOE8999_sgSfp | CRISPR/Cas9 plasmid with integrated sgRNA for *sfp* |
| pJOE8999_sgSfp_pA-PGB | CRISPR/Cas9 plasmid with integrated sgRNA for *sfp* and PGB expression cassette |
| pJOE8999_sgFlgE | CRISPR/Cas9 plasmid with integrated sgRNA for *flgE* |
| pJOE8999_sgFlgE_pA-PGB | CRISPR/Cas9 plasmid with integrated sgRNA for *flgE* and PGB expression cassette |
| pJOE8999_sgAmyE | CRISPR/Cas9 plasmid with integrated sgRNA for *amyE* |
| pJOE8999_sgAmyE_pA-PGB | CRISPR/Cas9 plasmid with integrated sgRNA for *amyE* and PGB expression cassette |

**Supplemental Table 2: Oligonucleotides used in this study.**

|  | **Oligonucleotide** | **Sequence 5’🡪3’** | **Application** |
| --- | --- | --- | --- |
| 1 | SigF_O1 | TACGACAGCCCGATGCAGCCGATC | sgRNA for *sigF* locus, *Bsa*I overhang |
| 2 | SigF_O2 | AAACGATCGGCTGCATCGGGCTGT | sgRNA for *sigF* locus, *Bsa*I overhang |
| 3 | Sfp_O1 | TACGGCACATCTCCCAGCAGGGTG | sgRNA for *sfp* locus, *Bsa*I overhang |
| 4 | Sfp_O2 | AAACCACCCTGCTGGGAGATGTGC | sgRNA for *sfp* locus, *Bsa*I overhang |
| 5 | Flg_O1 | TACGCACAAGACGGGGGACAAATC | sgRNA for *flgE* locus, *Bsa*I overhang |
| 6 | Flg_O2 | AAACGATTTGTCCCCCGTCTTGTG | sgRNA for *flgE* locus, *Bsa*I overhang |
| 7 | AmyE_O1 | TACGTGAAGATCAGGCTATCACTG | sgRNA for *amyE* locus, *Bsa*I overhang |
| 8 | AmyE_O2 | AAACCAGTGATAGCCTGATCTTCA | sgRNA for *amyE* locus, *Bsa*I overhang |
| 9 | RepairPG_Fw_SfI | AAGGCCATCGTGGCCGAA | Amplification of PGB expression cassette |
| 10 | RepairPG_Rev_SfI | AAGGCCTTCAGGGCCCGATTACGAATGCCGTCTC | Amplification of PGB expression cassette |
| 11 | Up_flank_sigF_for: | AAGGCCAACGAGGCCGCATGAGCCTTGGAATTGAC | Amplification *sigF* upstream flank |
| 12 | Up_flank_sigF_rev | AAGGCCACGATGGCCTCTCCTTAATTACAAAGCGC | Amplification *sigF* upstream flank |
| 13 | Down_flank_sigF_for | AAGGCCCTGAAGGCCCTAGTCTGCAGTGCAGGCTAG | Amplification *sigF* downstream flank |

| **Continuation Supplemental Table 2** | | | |
| --- | --- | --- | --- |
|  | **Oligonucleotide** | **Sequence 5’🡪3’** | **Application** |
| 14 | Down_flank_sigF_rev | AAGGCCTTATTGGCCCACCGTTATGCCTCCGCCG | Amplification *sigF* downstream flank |
| 15 | Up_flank_sfp_for | AAGGCCAACGAGGCCCTGTCAGATGTGCTACAATGAC | Amplification *sfp* upstream flank |
| 16 | Up_flank_sfp_rev | AAGGCCACGATGGCCCATTCTAGATCCTCCGTCTGC | Amplification *sfp* upstream flank |
| 17 | Down_flank_sfp_for | AAGGCCCTGAAGGCCGCTCATCAACAGCTTGACAC | Amplification *sfp* downstream flank |
| 18 | Down_flank_sfp_rev | AAGGCCTTATTGGCCGAAGATCGCCATTGAACAGC | Amplification *sfp* downstream flank |
| 19 | Up_flank_Flg_for | AAGGCCAACGAGGCCGCAGATGTCATCTGATATAC | Amplification *flgE* upstream flank |
| 20 | Up_flank_Flg_rev | AAGGCCACGATGGCCCCAGAATAAAGTGAACGTAAC | Amplification *flgE* upstream flank |
| 21 | Down_flank_Flg_for | AAGGCCCTGAAGGCCCATCTGATGAAATCCTTCAAG | Amplification *flgE* downstream flank |
| 22 | Down_flank_FlgF_rev | AAGGCCTTATTGGCCGAGTGGTAAGAAGTCTTGC | Amplification *flgE* downstream flank |
| 23 | Up_flank_AmyE_for | AAGGCCAACGAGGCCGGGCTTGTCTTTATCGTG | Amplification *amyE* upstream flank |
| 24 | Up_flank_AmyE_rev | AAGGCCACGATGGCCCCTGATGTGAAGACTGGA | Amplification *amyE* upstream flank |
| 25 | Down_flank_AmyE_for | AAGGCCCTGAAGGCC CAATGTGATGGCTGGACAG | Amplification *amyE* downstream flank |
| 26 | Down_flank_AmyE_rev | AAGGCCTTATTGGCC CTCAATGAGGAAGAGAACCG | Amplification *amyE* downstream flank |
| 27 | CC_AmyE | CTGTCCTTGCCGGTTTAATAG | Colony PCR |
| 28 | PG-seq 16/60 | GCTGAAGATACATCCAG | Colony PCR |
| 29 | CC_FlgE | CTGACAGATATGTGAATATAGG | Colony PCR |
| 30 | CC_sigF | GCCTGAACAAATCTCATTG | Colony PCR |
| 31 | CC_sfp | GAACGGCATATTTTCATTAC | Colony PCR |
| 32 | Seq_sgRNA_pJOE8999 | GACCTCAAAAAGGTCTTTA | Sequencing sgRNA in pJOE8999 |

**Supplemental Table 3: B. subtilis strains used in this study.**

| **Strain designation** | **Genotype** | **Reference** |
| --- | --- | --- |
| *B. subtilis* 007 | Wild-type isolate | DSM118688 |
| *B. subtilis* FS1 | *B. subtilis* 007 Δ*sigF*::pA_PGB | This study |
| *B. subtilis* FS2 | *B. subtilis* 007 Δ*sigF*::pA_PGB Δ*sfp*::pA_PGB | This study |
| *B. subtilis* FS3 | *B. subtilis* 007 Δ*sigF*::pA_PGB Δ*sfp*::pA_PGB Δ*flgE*::pA_PGB | This study |
| *B. subtilis* FS4 | *B. subtilis* 007 Δ*sigF*::pA_PGB Δ*sfp*::pA_PGB Δ*amyE*::pA_PGB | This study |


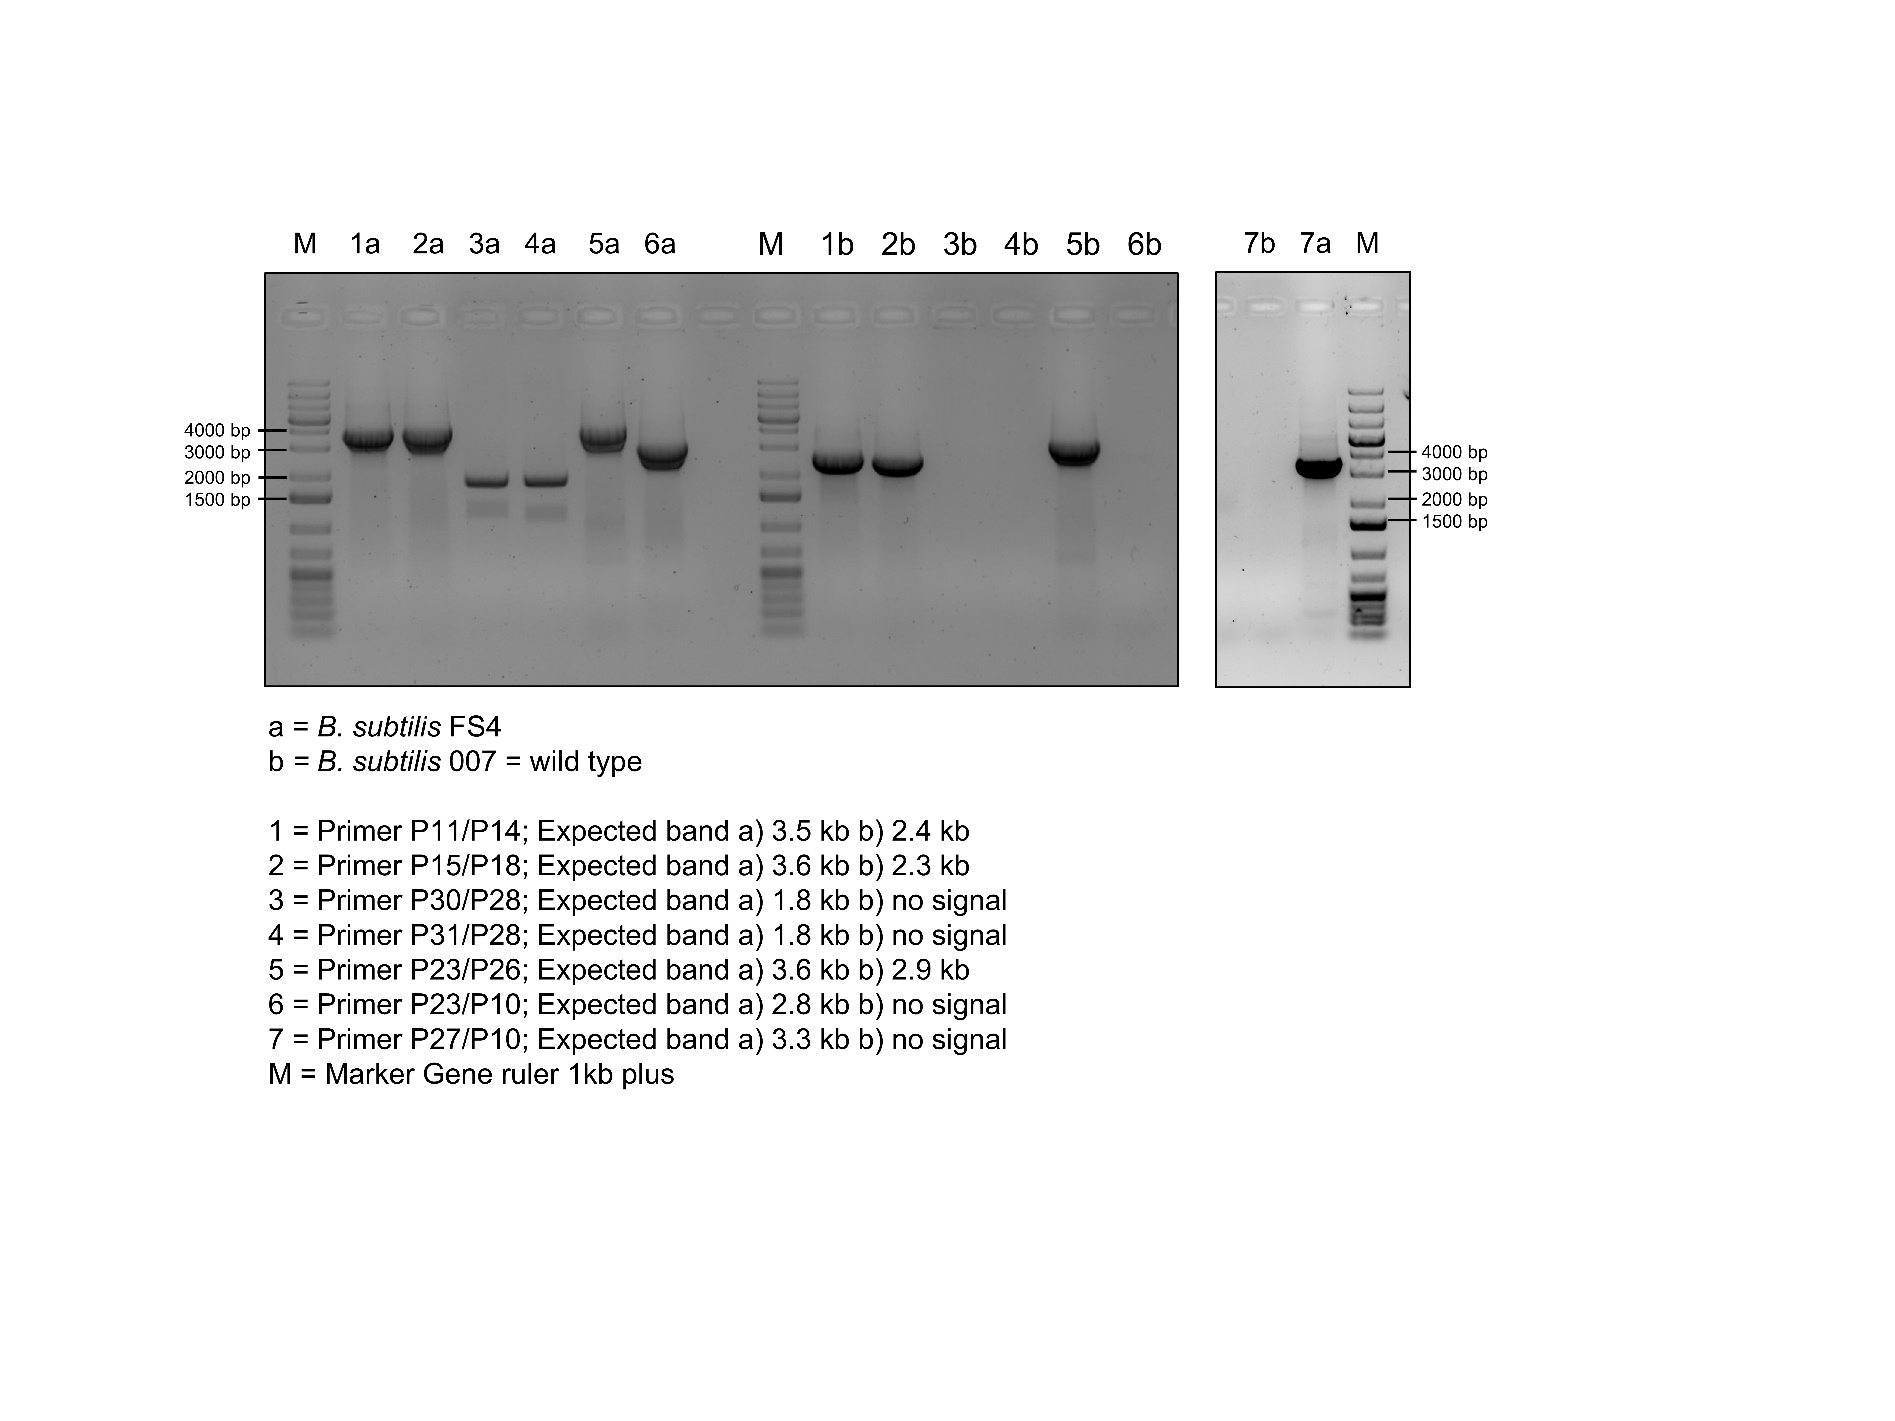


**Supplemental Figure 1: Agarose gel of colony PCR for verification of *B. subtilis* FS4.** Primer pairs bind in upstream and downstream flank of *sigF* (1), *sfp* (2), *amyE* (5); outside of flank and inside PGB expression cassette of *sigF* (3), *sfp* (4), *amyE* (7); in upstream flank and PGB expression cassette of *amyE* (6).

**A**


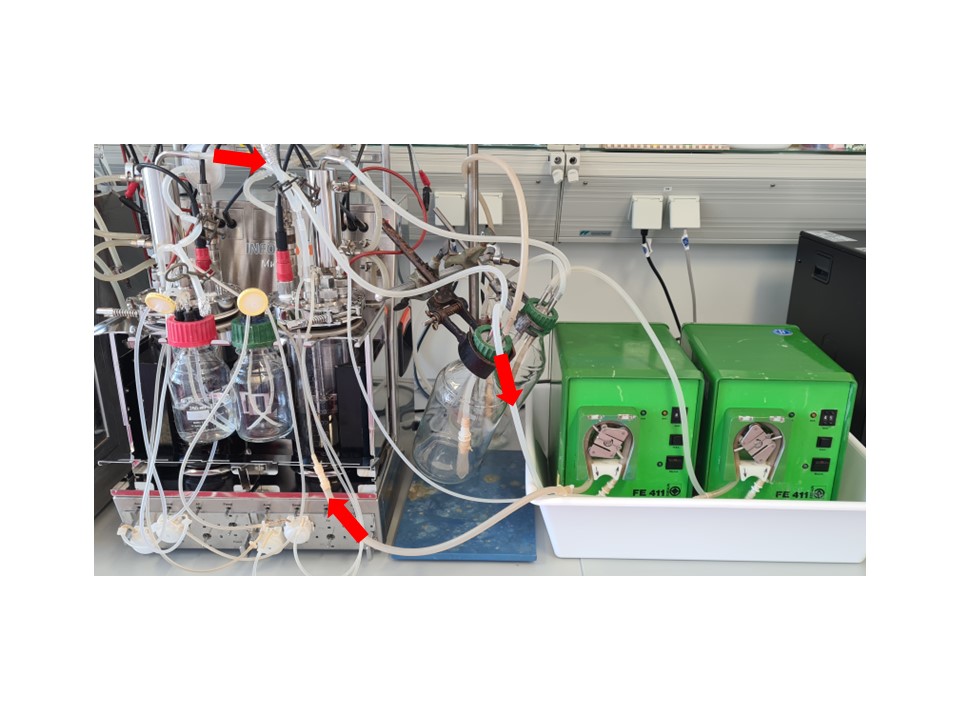


**B**

**
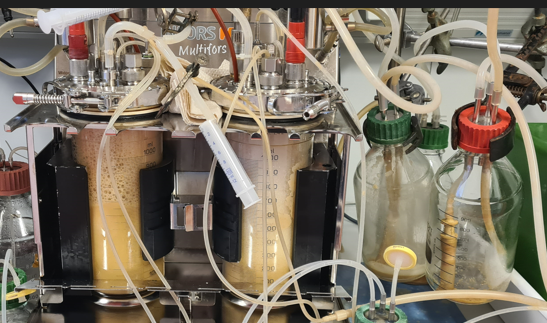
**

**Supplemental Figure 2: Foam trap (A) and excessive foaming during bioreactor cultivation of *B. subtilis* FS1 (B).** The red arrows indicate the direction of the foam pumped back into the reactors.


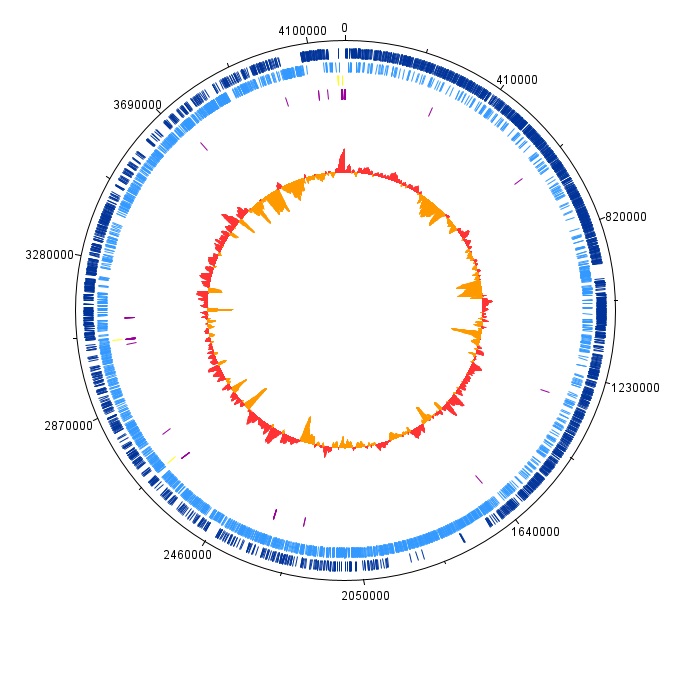


**Supplemental Figure 3: Genome map of *B. subtilis* 007.** CDS forward strand (dark blue); CDS reverse strand (blue); rRNA (yellow); tRNA (purple); GC plot below average (red) and above average (orange).


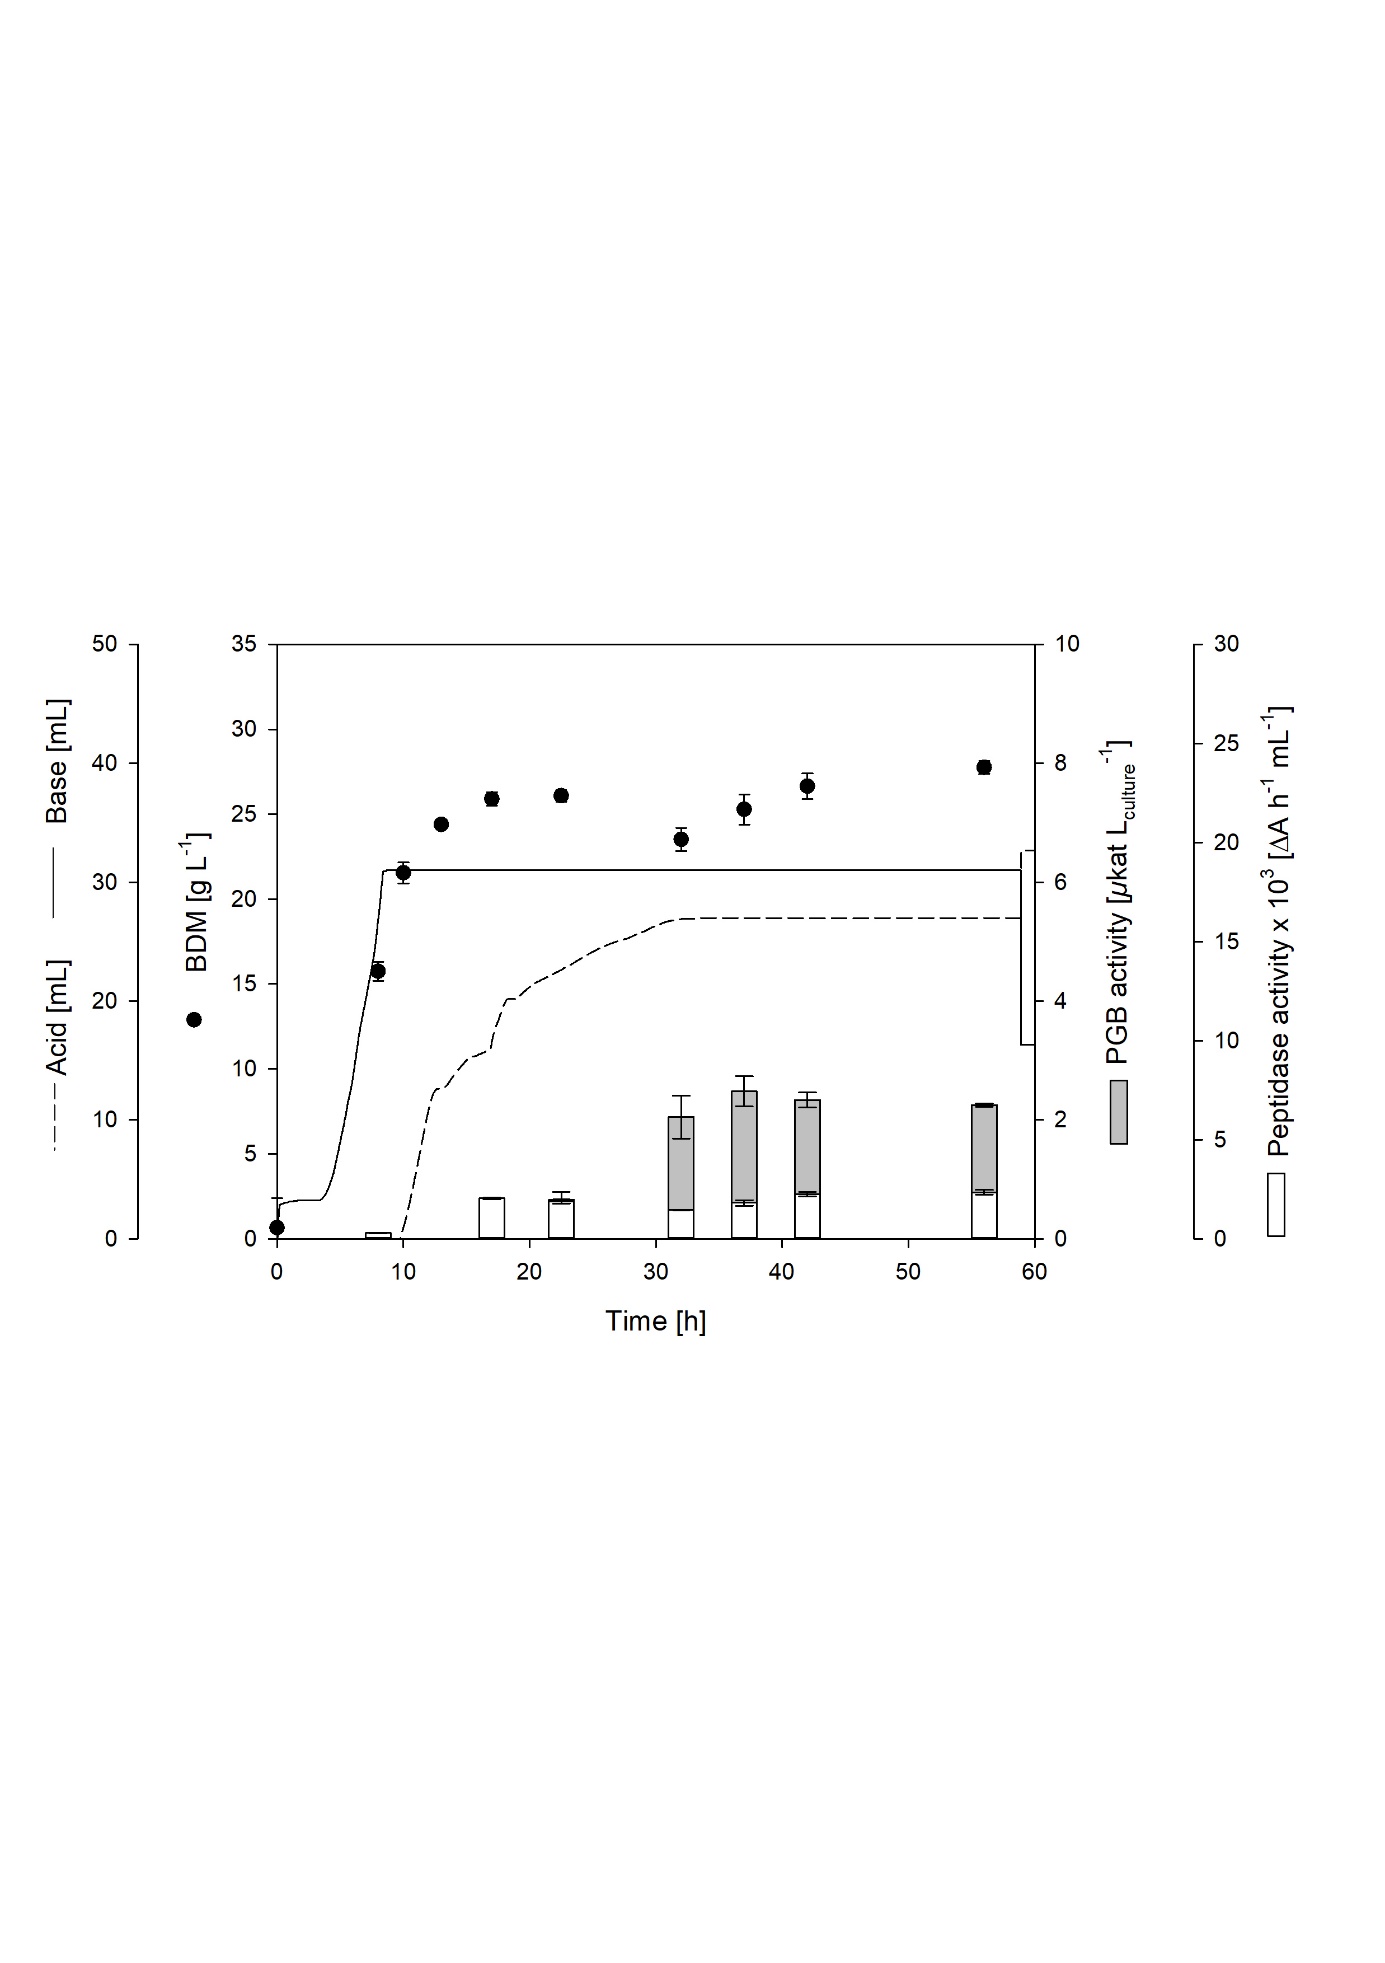


**Supplemental Figure 4: Bioreactor cultivations of *B. subtilis* FS3.**


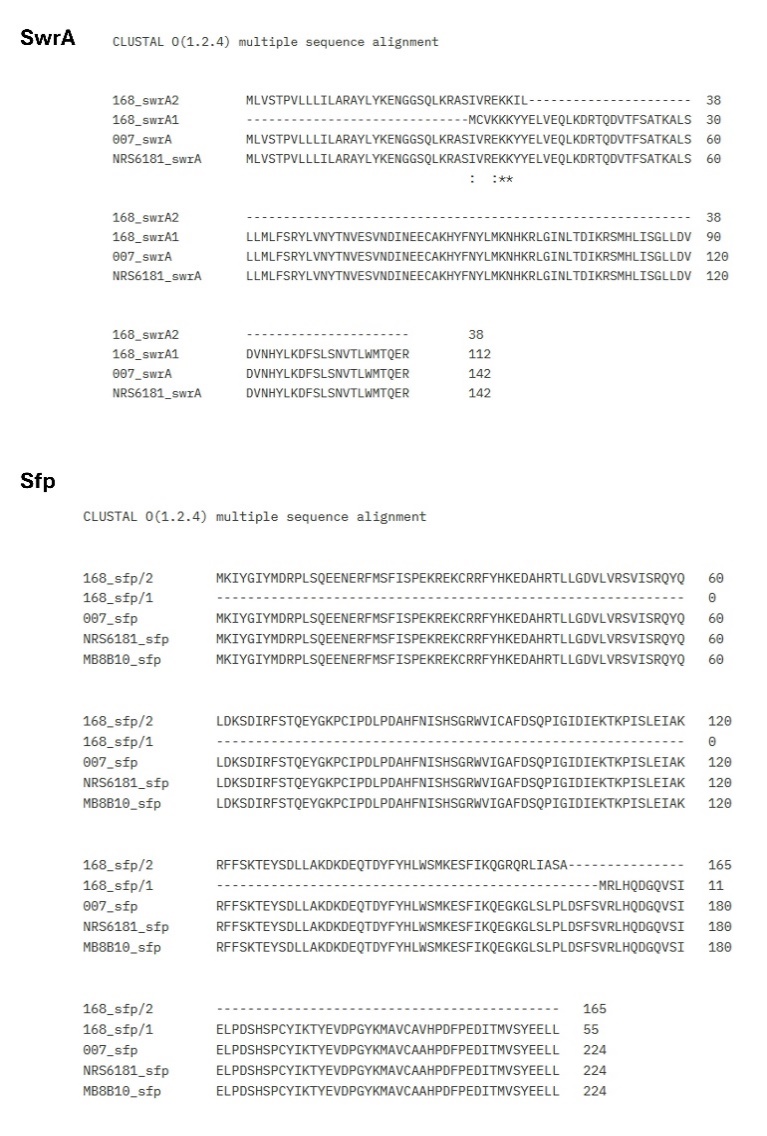

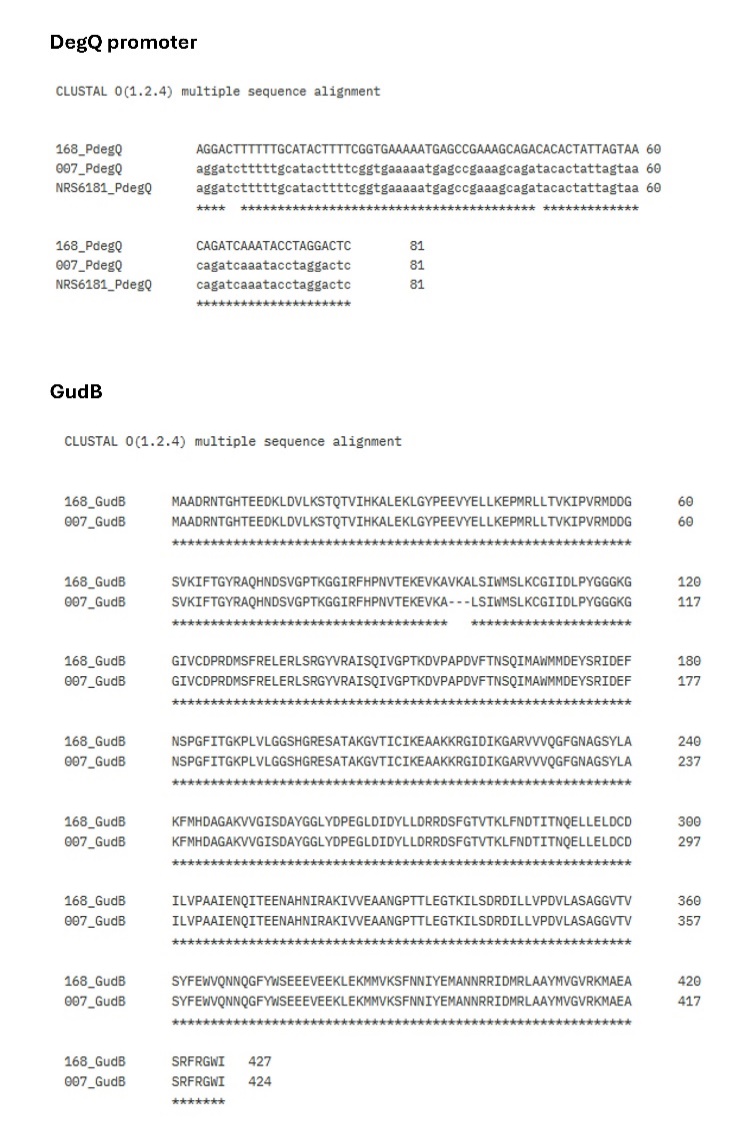

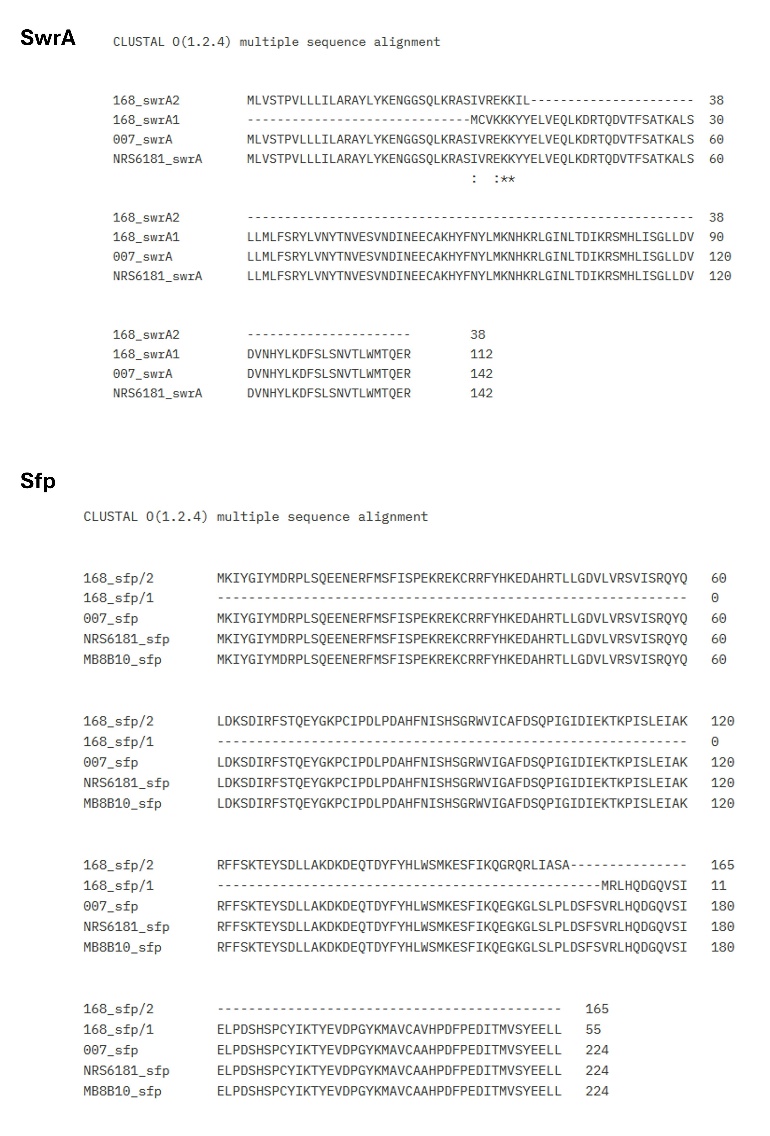


**Supplemental Figure 5: Sequence alignment of SwrA, Sfp and GudB of *B. subtilis* 007 and *B. subtilis* 168, NRS6181 or MB8_B10.**
